# Supplementary material
Source: PubMed Central journal article supplement (PMC6396149)
Supplement: EMBJ-38-e101432-s001.pdf [file EMBJ-38-e101432-s001.pdf]

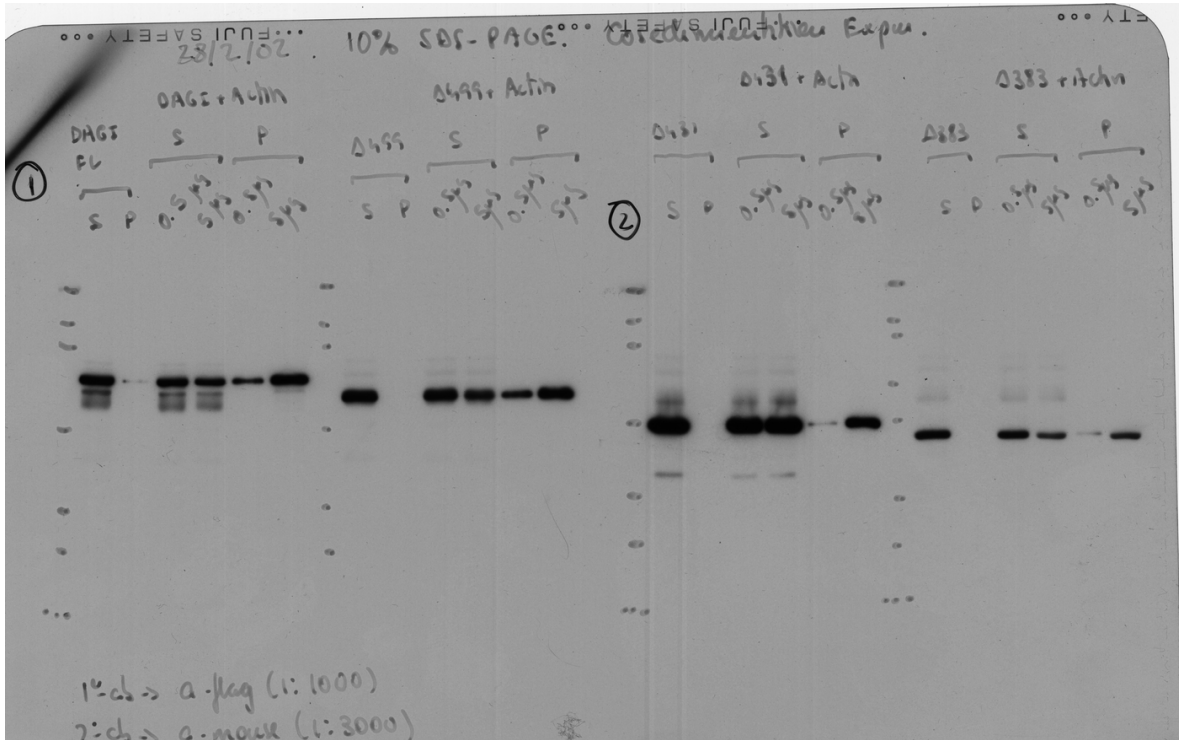

**Item 1. Detection of Flag-tagged RasGRP fragments.** This image shows a new scan of the original film used in the top panels of our original [Figure 6C](#). This film shows the detection of the Flag-tagged Ras GRP fragments using immunoblot analysis with antibodies to the Flag epitope that were utilized to generate the foregoing panels.



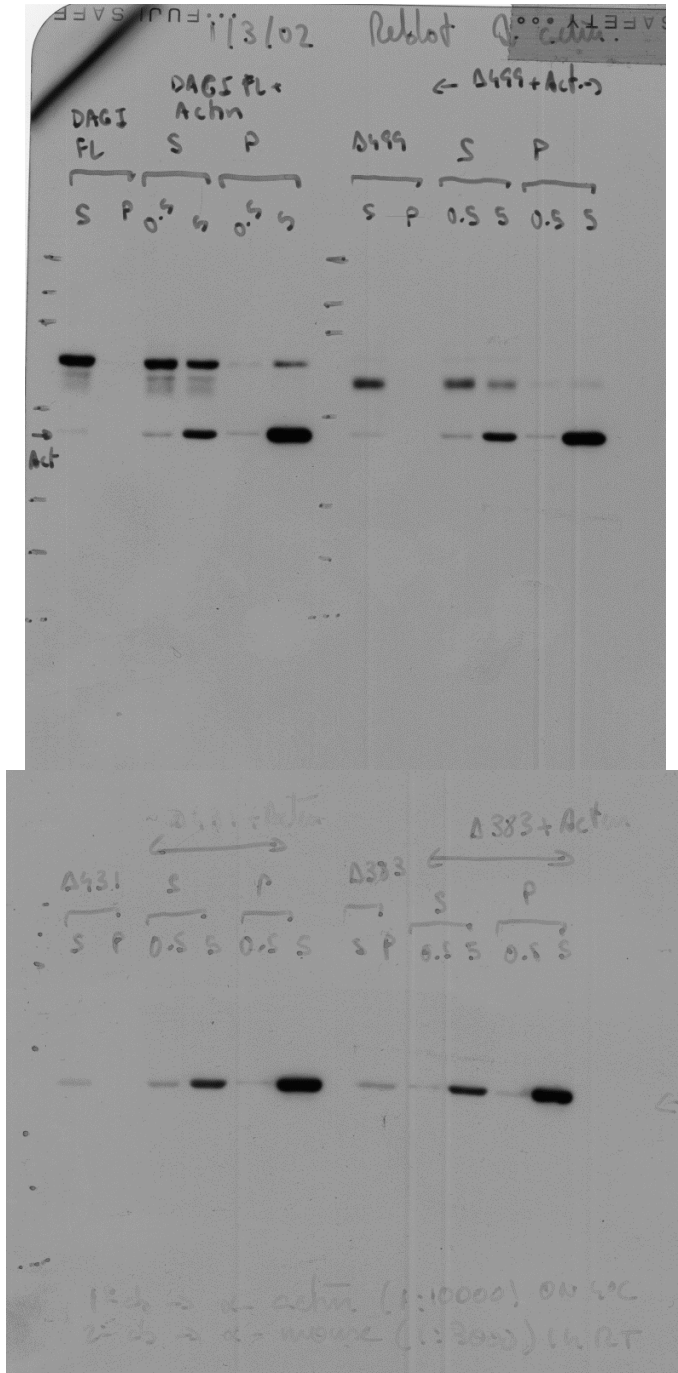

**Item 3. Detection of actin in immunoblots generated using independent aliquots of the same extracts analyzed in Items #1 and #2.** These images show new scans of the original films that were used to generate all the bottom panels of the **new Figure 6C** presented in this Corrigenda. These scans include the detection of: **(i)** The actin bands in a reblotted filter (top film). **(ii)** The actin bands detected in a filter derived from an independent electrophoresis of aliquots of the same centrifugation experiment (to avoid the overlap between actin and Ras GRP delta383-609 band as indicated in the discussion of **Item #2**) (bottom film).
